# Supplementary material
Source: Springer Nature journal article supplement (https://www.springermedizin.de/resource/supplementary/12889_2011_3556_MOESM1_ESM.pdf/9489258)

SUPRANATIONAL

SOCIETY

COMMUNITY

ORGANISATION

INTERPERSONAL

INDIVIDUAL

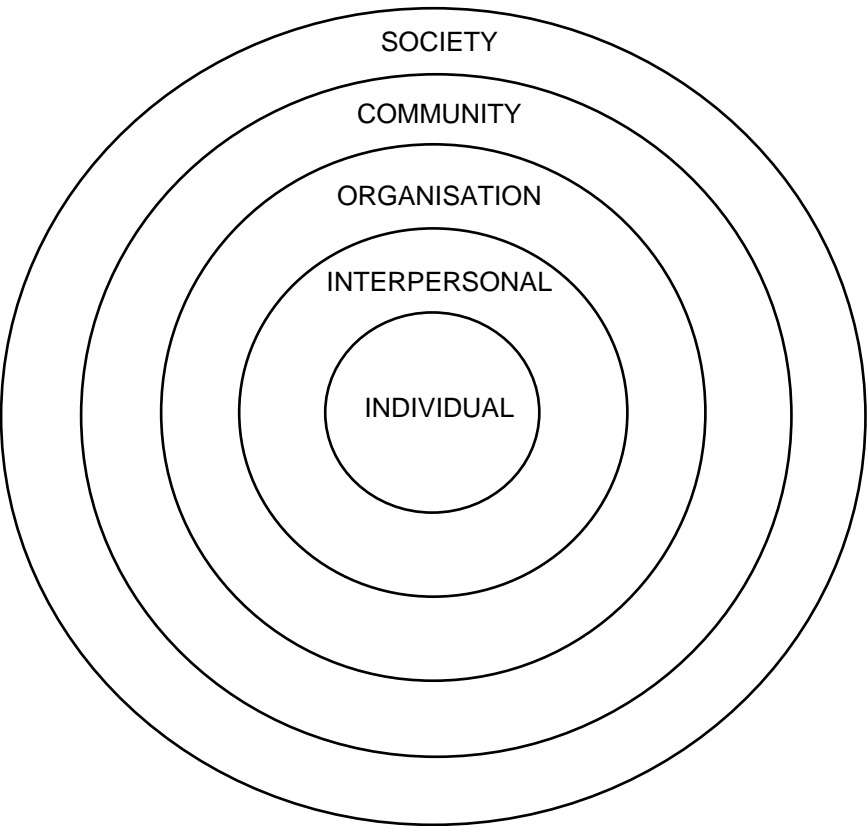

Supplement: MOESM1 [file 9489258]
